# Supplementary material for: Coupling of fluoroborylene ligands in manganese carbonyl chemistry to give a difluorodiborene ligand
Source: Royal Society of Chemistry journal article supplement (doi:10.1039/c9nj01209e), 2019-01-01
Supplement: c9nj01209e1.pdf [file c9nj01209e1.pdf]

# Coupling of Fluoroborylene Ligands in Manganese Carbonyl Chemistry to Give A Difluorodiborene Ligand

Liancai Xu,<sup>a\*</sup> Qian-shu Li,<sup>b,c</sup> R. Bruce King<sup>b,d\*</sup>

<sup>a</sup>Department of Material and Chemical Engineering, Zhengzhou University of Light  
Industry, Zhengzhou 450002, P.R. China

<sup>b</sup>Center for Computational Quantum Chemistry, South China Normal University,  
Guangzhou 510631, P.R. China

<sup>c</sup>Institute of Chemical Physics, Beijing Institute of Technology, Beijing 100081, P.R.  
China

<sup>d</sup>Department of Chemistry and Center for Computational Chemistry, University of  
Georgia, Athens, Georgia 30602, USA

## Supporting Information

**Tables S1-S4:** Theoretical harmonic vibrational frequencies (in  $\text{cm}^{-1}$ ) for optimized structures of  $\text{Mn}_2(\text{BF})_2(\text{CO})_8$ ,  $\text{Mn}_2(\text{BF})_2(\text{CO})_7$  and  $\text{Mn}_2(\text{BF})_2(\text{CO})_6$  using the BP86/TZP method.

**Table S5:** Theoretical Cartesian coordinates for  $\text{Mn}_2(\text{BF})_2(\text{CO})_8$  (2 structures),  $\text{Mn}_2(\text{BF})_2(\text{CO})_7$  (5 structures) and  $\text{Mn}_2(\text{BF})_2(\text{CO})_6$  (8 structures) at M06-L/TZP level Complete Gaussian 09 reference ( Reference 44)

**Table S1.** Theoretical harmonic vibrational frequencies (in  $\text{cm}^{-1}$ ) for optimized structures of  $\text{Mn}_2(\text{BF})_2(\text{CO})_8$  using the BP86/TZP method (infrared intensities in parentheses are in  $\text{km/mol}$ ).

| 8-1S ( $D_{2h}$ )          | 8-2S ( $C_2$ )         |
|----------------------------|------------------------|
| 3.3 ( $a_u, 0.0$ )         | 17.0 ( $a'', 0.1$ )    |
| 37.2 ( $b_{1g}, 0.0$ )     | 37.4 ( $a'', 0.1$ )    |
| 38.8 ( $b_{3g}, 0.0$ )     | 37.7 ( $a', 0.5$ )     |
| 45.3 ( $b_{1u}, 0.0$ )     | 49.2 ( $a', 0.0$ )     |
| 46.5 ( $b_{2u}, 0.0$ )     | 51.1 ( $a'', 0.1$ )    |
| 56.8 ( $b_{3u}, 0.4$ )     | 60.1 ( $a', 1.2$ )     |
| 81.7 ( $b_{2g}, 0.0$ )     | 76.2 ( $a'', 0.2$ )    |
| 83.1 ( $a_g, 0.0$ )        | 82.1 ( $a', 0.0$ )     |
| 89.5 ( $b_{1u}, 0.8$ )     | 86.6 ( $a'', 0.2$ )    |
| 93.3 ( $a_u, 0.0$ )        | 91.6 ( $a'', 0.3$ )    |
| 93.6 ( $b_{2u}, 0.8$ )     | 92.7 ( $a', 0.8$ )     |
| 96.3 ( $b_{3g}, 0.0$ )     | 94.0 ( $a'', 0.0$ )    |
| 104.5 ( $b_{3u}, 0.0$ )    | 99.4 ( $a', 0.3$ )     |
| 111.0 ( $a_g, 0.0$ )       | 102.2 ( $a', 0.0$ )    |
| 112.7 ( $b_{1g}, 0.0$ )    | 109.4 ( $a'', 0.1$ )   |
| 113.8 ( $b_{2g}, 0.0$ )    | 113.6 ( $a'', 0.3$ )   |
| 118.0 ( $b_{1u}, 0.3$ )    | 115.1 ( $a', 1.9$ )    |
| 209.4 ( $b_{3u}, 1.0$ )    | 196.6 ( $a', 13.9$ )   |
| 212.2 ( $a_g, 0.0$ )       | 207.2 ( $a', 12.7$ )   |
| 234.6 ( $b_{1g}, 0.0$ )    | 228.1 ( $a', 0.5$ )    |
| 359.5 ( $b_{1g}, 0.0$ )    | 335.1 ( $a', 20.7$ )   |
| 363.8 ( $a_g, 0.0$ )       | 360.9 ( $a', 2.0$ )    |
| 371.2 ( $b_{2u}, 0.1$ )    | 367.3 ( $a', 2.1$ )    |
| 379.4 ( $b_{3g}, 0.0$ )    | 379.1 ( $a'', 0.6$ )   |
| 400.1 ( $b_{1u}, 0.1$ )    | 404.2 ( $a'', 0.4$ )   |
| 416.2 ( $a_u, 0.0$ )       | 409.3 ( $a'', 0.2$ )   |
| 436.3 ( $b_{2g}, 0.0$ )    | 419.9 ( $a', 3.3$ )    |
| 439.9 ( $b_{3u}, 1.0$ )    | 434.2 ( $a'', 0.5$ )   |
| 443.9 ( $a_g, 0.0$ )       | 438.8 ( $a', 2.2$ )    |
| 450.2 ( $b_{2u}, 1.6$ )    | 446.9 ( $a', 1.2$ )    |
| 468.6 ( $b_{1g}, 0.0$ )    | 468.1 ( $a', 8.4$ )    |
| 469.6 ( $b_{1u}, 2.8$ )    | 474.1 ( $a'', 3.9$ )   |
| 475.1 ( $b_{3g}, 0.0$ )    | 478.5 ( $a', 22.3$ )   |
| 491.0 ( $b_{3u}, 28.0$ )   | 481.6 ( $a', 0.5$ )    |
| 502.7 ( $b_{1g}, 0.0$ )    | 483.9 ( $a'', 0.3$ )   |
| 503.7 ( $b_{2u}, 8.8$ )    | 497.0 ( $a', 11.4$ )   |
| 509.8 ( $a_g, 0.0$ )       | 502.3 ( $a', 7.9$ )    |
| 520.8 ( $b_{3u}, 91.0$ )   | 507.2 ( $a', 10.9$ )   |
| 531.3 ( $b_{2g}, 0.0$ )    | 513.4 ( $a'', 0.1$ )   |
| 540.8 ( $a_g, 0.0$ )       | 536.8 ( $a'', 6.2$ )   |
| 555.3 ( $b_{3u}, 186.5$ )  | 538.1 ( $a', 136.3$ )  |
| 556.7 ( $b_{1u}, 25.3$ )   | 554.5 ( $a', 135.8$ )  |
| 570.7 ( $a_u, 0.0$ )       | 561.1 ( $a'', 12.6$ )  |
| 573.8 ( $b_{3g}, 0.0$ )    | 572.4 ( $a'', 1.1$ )   |
| 636.6 ( $b_{2g}, 0.0$ )    | 624.6 ( $a'', 15.9$ )  |
| 655.1 ( $b_{1u}, 216.4$ )  | 651.2 ( $a'', 190.5$ ) |
| 675.6 ( $b_{1g}, 0.0$ )    | 667.9 ( $a', 341.6$ )  |
| 681.6 ( $b_{3u}, 691.7$ )  | 677.4 ( $a', 289.0$ )  |
| 682.0 ( $b_{2u}, 161.7$ )  | 680.1 ( $a', 113.3$ )  |
| 698.0 ( $a_g, 0.0$ )       | 689.8 ( $a', 6.6$ )    |
| 1295.7 ( $b_{2u}, 662.0$ ) | 1259.9 ( $a', 271.7$ ) |
| 1319.1 ( $a_g, 0.0$ )      | 1454.5 ( $a', 738.4$ ) |
| 1975.2 ( $b_{2g}, 0.0$ )   | 1863.9 ( $a', 300.7$ ) |
| 1995.7 ( $b_{1g}, 0.0$ )   | 1968.5 ( $a'', 53.7$ ) |

---

|                                  |                     |
|----------------------------------|---------------------|
| 1997.5 (b <sub>3u</sub> ,736.8)  | 1994.2 (a',813.5)   |
| 2000.6 (b <sub>2u</sub> ,1574.9) | 1997.8 (a',182.7)   |
| 2008.0 (a <sub>g</sub> ,0.0)     | 2001.5 (a'',2204.4) |
| 2008.3 (b <sub>1u</sub> ,2229.8) | 2010.2 (a',441.4)   |
| 2048.4 (b <sub>3u</sub> ,1070.1) | 2036.7 (a',1126.3)  |
| 2087.7 (a <sub>g</sub> ,0.0)     | 2081.7 (a',145.8)   |

---

**Table S2.** Theoretical harmonic vibrational frequencies (in  $\text{cm}^{-1}$ ) for optimized structures of  $\text{Mn}_2(\text{BF})_2(\text{CO})_7$  using the BP86/TZP method (infrared intensities in parentheses are in  $\text{km/mol}$ ).

| 7-1S( $C_s$ )     | 7-2S( $C_s$ )     | 7-3S( $C_s$ )     | 7-4S( $C_1$ )    | 7-1T( $C_s$ )     |
|-------------------|-------------------|-------------------|------------------|-------------------|
| 17.0(a",0.0)      | 15.7(a",0.0)      | 13.3(a",0.1)      | 16.2(a,0.1)      | 22.7(a",0.0)      |
| 36.5(a',0.4)      | 30.5(a",0.0)      | 16.7(a',0.1)      | 27.7(a,0.1)      | 30.4(a",0.0)      |
| 36.5(a",0.0)      | 49.8(a",0.1)      | 41.6(a',0.0)      | 41.2(a,0.4)      | 35.5(a',1.6)      |
| 49.8(a",0.1)      | 68.2(a',0.5)      | 76.7(a",0.0)      | 44.8(a,0.2)      | 45.7(a",0.1)      |
| 58.7(a',0.0)      | 74.4(a',1.9)      | 82.7(a',0.2)      | 66.7(a,0.0)      | 55.6(a',1.3)      |
| 66.4(a",0.1)      | 75.3(a",0.0)      | 87.1(a",0.0)      | 75.4(a,0.1)      | 70.0(a",0.0)      |
| 68.7(a',1.7)      | 86.4(a',0.1)      | 89.2(a',0.2)      | 76.8(a,0.2)      | 73.9(a',0.1)      |
| 79.6(a',0.4)      | 88.9(a",0.4)      | 91.3(a',0.2)      | 81.1(a,0.4)      | 80.4(a',0.2)      |
| 86.4(a',0.0)      | 93.0(a",0.5)      | 104.2(a',0.9)     | 85.1(a,0.9)      | 81.3(a",0.5)      |
| 91.2(a",0.0)      | 96.0(a',0.0)      | 108.4(a',0.6)     | 89.4(a,0.5)      | 86.4(a',0.1)      |
| 93.6(a',0.4)      | 108.6(a',0.4)     | 115.6(a",0.0)     | 94.5(a,0.4)      | 89.2(a",0.8)      |
| 96.1(a",0.9)      | 114.4(a',0.1)     | 124.1(a",0.3)     | 100.1(a,0.5)     | 94.5(a',0.0)      |
| 105.0(a',0.0)     | 116.6(a",0.1)     | 135.9(a",0.2)     | 105.3(a,0.1)     | 102.6(a",0.0)     |
| 112.2(a",0.0)     | 131.8(a',1.0)     | 137.8(a',0.2)     | 113.1(a,0.1)     | 102.9(a',0.8)     |
| 112.4(a',0.1)     | 164.1(a',3.9)     | 209.5(a",0.0)     | 123.6(a,1.1)     | 113.0(a',3.6)     |
| 202.2(a',0.3)     | 199.3(a",0.3)     | 233.3(a",0.3)     | 178.1(a,13.3)    | 189.0(a',0.1)     |
| 213.8(a',1.2)     | 220.1(a',0.6)     | 235.9(a',3.7)     | 207.5(a,0.8)     | 212.6(a",0.0)     |
| 238.2(a",0.0)     | 229.7(a',1.5)     | 243.3(a",0.2)     | 228.4(a,0.0)     | 236.9(a',0.9)     |
| 365.1(a",0.0)     | 346.5(a",2.5)     | 364.7(a',2.5)     | 359.4(a,16.9)    | 286.5(a',1.3)     |
| 378.5(a',1.4)     | 363.3(a',0.4)     | 371.1(a",8.0)     | 371.0(a,3.5)     | 317.5(a",0.1)     |
| 383.4(a",0.0)     | 369.1(a",0.5)     | 388.1(a",0.1)     | 383.5(a,1.1)     | 373.0(a",0.0)     |
| 394.0(a",0.0)     | 397.4(a",0.0)     | 389.7(a',0.0)     | 393.4(a,0.8)     | 382.3(a",0.4)     |
| 395.0(a',0.2)     | 397.9(a',4.1)     | 393.0(a',0.0)     | 409.5(a,1.3)     | 384.6(a',2.9)     |
| 411.4(a",0.1)     | 403.7(a",0.2)     | 403.7(a',3.0)     | 416.4(a,7.0)     | 392.6(a',0.4)     |
| 441.3(a',4.1)     | 426.5(a',10.8)    | 407.0(a",0.5)     | 433.6(a,0.3)     | 415.1(a",0.1)     |
| 443.0(a",0.8)     | 431.7(a",0.8)     | 412.1(a',0.2)     | 441.9(a,5.4)     | 420.7(a",0.0)     |
| 452.1(a',3.4)     | 440.8(a",0.0)     | 444.2(a',1.9)     | 447.4(a,8.4)     | 430.2(a',3.4)     |
| 459.0(a",0.1)     | 444.0(a',5.5)     | 446.5(a",0.0)     | 452.8(a,0.3)     | 435.1(a",0.0)     |
| 472.8(a',10.1)    | 465.2(a",0.7)     | 451.2(a',0.4)     | 468.4(a,0.7)     | 441.2(a",0.3)     |
| 485.5(a',3.0)     | 468.4(a',12.7)    | 461.6(a",0.0)     | 474.5(a,3.3)     | 442.7(a',1.6)     |
| 488.1(a",0.7)     | 475.3(a',8.9)     | 488.1(a',1.9)     | 481.6(a,0.4)     | 460.3(a',16.5)    |
| 499.8(a",2.3)     | 498.6(a",4.8)     | 493.6(a",35.2)    | 486.9(a,4.8)     | 461.4(a',2.1)     |
| 512.7(a',6.2)     | 501.9(a',1.4)     | 509.3(a',6.7)     | 488.3(a,7.7)     | 474.4(a",8.7)     |
| 514.1(a',13.5)    | 513.9(a",4.3)     | 516.3(a",6.3)     | 500.0(a,2.7)     | 483.9(a',0.8)     |
| 519.6(a",13.9)    | 515.1(a',5.3)     | 521.4(a',0.4)     | 520.0(a,10.0)    | 497.2(a",1.2)     |
| 533.8(a',36.2)    | 531.0(a',25.8)    | 539.8(a',1.9)     | 525.9(a,16.0)    | 507.2(a',84.1)    |
| 550.7(a',53.4)    | 552.9(a",2.2)     | 545.5(a",0.0)     | 545.1(a,8.1)     | 523.5(a',56.8)    |
| 558.6(a",0.1)     | 558.8(a',8.3)     | 558.4(a',5.0)     | 551.3(a,55.7)    | 539.8(a',9.4)     |
| 566.9(a',14.6)    | 576.1(a',2.7)     | 569.5(a",3.7)     | 568.0(a,0.2)     | 539.8(a",2.8)     |
| 609.6(a',85.1)    | 605.1(a",27.7)    | 603.7(a",44.4)    | 611.4(a,41.6)    | 599.1(a',31.5)    |
| 637.5(a",18.4)    | 613.6(a',3.1)     | 617.2(a",0.3)     | 636.5(a,79.9)    | 600.3(a",5.5)     |
| 647.7(a',123.5)   | 638.6(a",79.6)    | 617.3(a',96.7)    | 640.6(a,103.2)   | 615.3(a',80.7)    |
| 659.3(a",83.2)    | 640.7(a',169.5)   | 643.9(a',25.8)    | 645.8(a,72.9)    | 626.4(a',455.6)   |
| 675.2(a',486.6)   | 670.6(a',406.5)   | 664.3(a",378.7)   | 672.7(a,366.0)   | 626.8(a",111.9)   |
| 685.7(a',25.1)    | 685.2(a',7.1)     | 675.7(a',86.0)    | 689.6(a,23.0)    | 657.4(a',67.6)    |
| 1312.6(a",633.2)  | 1304.7(a",266.3)  | 1285.0(a',229.7)  | 1279.8(a,281.2)  | 1362.9(a",624.4)  |
| 1330.8(a',37.5)   | 1327.8(a',459.9)  | 1327.0(a',412.5)  | 1450.7(a,736.0)  | 1371.5(a',264.1)  |
| 1957.4(a',389.1)  | 1900.5(a',352.3)  | 1829.9(a',318.3)  | 1882.8(a,384.7)  | 1906.2(a',447.9)  |
| 1974.0(a",594.1)  | 1984.3(a",487.0)  | 1982.8(a",1.1)    | 1965.5(a,184.1)  | 1973.0(a',446.8)  |
| 1990.5(a',1113.3) | 1995.9(a',359.6)  | 1989.5(a',1502.1) | 1978.7(a,1058.6) | 1985.5(a',1010.1) |
| 2000.8(a",946.0)  | 1997.7(a",1041.4) | 2000.1(a",260.8)  | 1983.7(a,1123.0) | 1990.7(a",178.3)  |
| 2007.8(a',1427.9) | 1999.3(a',1004.4) | 2008.5(a',1121.1) | 1998.6(a,536.1)  | 1996.7(a",1304.0) |
| 2015.2(a',743.1)  | 2024.7(a',2049.5) | 2025.9(a",2108.7) | 2018.6(a,1637.9) | 2011.4(a',2073.2) |
| 2070.7(a',178.5)  | 2064.6(a',72.5)   | 2063.8(a',86.2)   | 2058.2(a,138.9)  | 2053.6(a',31.8)   |

**Table S3.** Theoretical harmonic vibrational frequencies (in  $\text{cm}^{-1}$ ) for optimized structures of  $\text{Mn}_2(\text{BF})_2(\text{CO})_6$  using the BP86/TZP method (infrared intensities in parentheses are in  $\text{km/mol}$ ).

| 6-1S( $C_s$ )     | 6-2S( $C_{2v}$ )               | 6-3S( $C_1$ )    | 6-4S( $C_s$ )     | 6-5S( $C_s$ )     |
|-------------------|--------------------------------|------------------|-------------------|-------------------|
| 20.0(a",0.0)      | 27.9(a <sub>2</sub> ,0.0)      | 26.9(a,0.1)      | 17.6(a",0.2)      | 49.2i(a",0.0)     |
| 46.2(a",0.3)      | 56.8(a <sub>1</sub> ,0.3)      | 48.0(a,0.3)      | 22.0(a",0.0)      | 22.7(a",0.0)      |
| 63.7(a",0.0)      | 59.1(b <sub>1</sub> ,0.0)      | 49.9(a,0.1)      | 32.9(a",0.5)      | 45.8(a",0.0)      |
| 72.5(a',0.2)      | 59.5(b <sub>2</sub> ,1.2)      | 58.6(a,0.5)      | 67.3(a',0.1)      | 57.5(a',0.7)      |
| 78.6(a',0.7)      | 70.6(a <sub>2</sub> ,0.0)      | 70.9(a,0.0)      | 73.2(a",0.2)      | 73.9(a",0.3)      |
| 85.8(a",0.1)      | 81.3(b <sub>1</sub> ,1.0)      | 79.9(a,0.6)      | 75.0(a',0.0)      | 88.1(a',0.1)      |
| 92.2(a',0.0)      | 81.4(a <sub>1</sub> ,0.0)      | 83.6(a,0.5)      | 88.2(a",0.4)      | 88.6(a",0.2)      |
| 94.2(a',0.0)      | 85.1(b <sub>1</sub> ,0.6)      | 86.8(a,0.4)      | 88.6(a',0.5)      | 94.0(a',1.2)      |
| 95.6(a",0.2)      | 96.4(a <sub>1</sub> ,1.0)      | 97.4(a,1.0)      | 98.2(a",0.1)      | 102.4(a",0.4)     |
| 103.1(a",0.1)     | 101.5(a <sub>1</sub> ,0.0)     | 99.0(a,0.4)      | 103.7(a',0.1)     | 102.7(a',0.0)     |
| 106.3(a',0.0)     | 106.2(b <sub>2</sub> ,0.5)     | 106.2(a,0.2)     | 113.2(a",0.1)     | 110.0(a',0.2)     |
| 128.3(a',0.5)     | 125.7(b <sub>2</sub> ,0.5)     | 117.9(a,0.5)     | 113.2(a',0.1)     | 117.8(a",0.1)     |
| 151.7(a',0.3)     | 127.7(a <sub>2</sub> ,0.0)     | 141.8(a,0.1)     | 143.5(a',0.1)     | 137.2(a',0.8)     |
| 171.4(a",0.5)     | 206.3(b <sub>2</sub> ,0.1)     | 212.0(a,0.1)     | 167.5(a',0.4)     | 146.9(a',0.4)     |
| 222.6(a',0.2)     | 241.2(a <sub>2</sub> ,0.0)     | 242.3(a,0.1)     | 227.2(a',1.1)     | 201.6(a',0.4)     |
| 264.5(a',3.1)     | 252.2(a <sub>1</sub> ,0.1)     | 248.4(a,0.0)     | 254.9(a',0.1)     | 241.6(a',0.3)     |
| 320.4(a",5.1)     | 355.8(b <sub>2</sub> ,0.3)     | 305.0(a,1.3)     | 383.2(a",0.0)     | 361.4(a",0.2)     |
| 358.6(a',10.9)    | 365.8(b <sub>1</sub> ,0.0)     | 381.2(a,0.9)     | 388.1(a',1.5)     | 376.2(a",1.1)     |
| 385.5(a",0.1)     | 375.9(a <sub>2</sub> ,0.0)     | 395.3(a,1.2)     | 392.5(a",0.3)     | 386.9(a",0.2)     |
| 408.1(a",1.7)     | 398.2(a <sub>1</sub> ,0.5)     | 401.0(a,0.5)     | 411.9(a',5.8)     | 397.3(a',11.3)    |
| 426.5(a",0.7)     | 404.3(a <sub>2</sub> ,0.0)     | 409.7(a,1.0)     | 412.0(a",0.1)     | 408.2(a',4.2)     |
| 433.6(a",0.2)     | 410.3(b <sub>1</sub> ,0.9)     | 413.1(a,1.7)     | 426.1(a",4.5)     | 411.6(a",0.1)     |
| 437.3(a',2.3)     | 424.8(a <sub>1</sub> ,0.0)     | 424.3(a,1.7)     | 450.4(a',3.0)     | 437.1(a',13.4)    |
| 451.3(a',1.9)     | 428.7(b <sub>1</sub> ,0.4)     | 430.3(a,2.6)     | 459.5(a",0.9)     | 452.5(a',13.2)    |
| 455.2(a",0.5)     | 458.0(b <sub>2</sub> ,17.3)    | 457.3(a,1.7)     | 462.4(a',0.4)     | 456.9(a',2.3)     |
| 469.5(a',8.7)     | 461.1(a <sub>2</sub> ,0.0)     | 461.3(a,4.0)     | 465.6(a",0.2)     | 460.3(a",0.4)     |
| 472.8(a",1.0)     | 462.4(b <sub>1</sub> ,0.9)     | 466.7(a,2.0)     | 482.3(a',3.0)     | 471.7(a",0.6)     |
| 483.4(a',1.4)     | 476.1(b <sub>2</sub> ,2.9)     | 483.8(a,12.1)    | 487.3(a',1.2)     | 475.5(a',1.4)     |
| 495.7(a",2.7)     | 476.8(a <sub>1</sub> ,0.1)     | 489.2(a,1.5)     | 499.1(a",3.6)     | 487.4(a',10.9)    |
| 519.6(a',3.8)     | 519.4(a <sub>2</sub> ,0.0)     | 496.6(a,5.5)     | 508.4(a',12.4)    | 509.5(a',2.2)     |
| 523.7(a',5.3)     | 520.4(b <sub>1</sub> ,0.0)     | 507.1(a,10.9)    | 526.3(a',0.6)     | 516.3(a',0.1)     |
| 538.7(a',1.2)     | 523.9(a <sub>1</sub> ,5.8)     | 523.7(a,9.1)     | 552.5(a',4.5)     | 525.2(a",6.1)     |
| 556.8(a",1.3)     | 532.0(b <sub>2</sub> ,26.8)    | 529.2(a,1.4)     | 563.3(a",0.1)     | 548.7(a",0.6)     |
| 564.7(a',7.8)     | 544.9(a <sub>1</sub> ,4.4)     | 544.1(a,14.0)    | 571.3(a',2.1)     | 559.7(a',5.7)     |
| 582.2(a",29.0)    | 612.1(a <sub>2</sub> ,0.0)     | 600.4(a,61.9)    | 585.8(a',19.4)    | 623.2(a',142.2)   |
| 600.2(a',10.3)    | 617.4(b <sub>1</sub> ,69.2)    | 613.5(a,27.5)    | 604.4(a",34.0)    | 628.6(a',29.9)    |
| 643.5(a',136.8)   | 632.0(b <sub>2</sub> ,166.4)   | 622.9(a,82.9)    | 645.8(a",72.5)    | 632.3(a",34.0)    |
| 646.1(a",66.2)    | 639.8(a <sub>1</sub> ,49.9)    | 634.6(a,28.5)    | 646.8(a',82.6)    | 641.1(a',47.0)    |
| 669.4(a',26.7)    | 652.4(b <sub>2</sub> ,71.7)    | 643.6(a,86.4)    | 668.2(a',67.2)    | 656.0(a",84.8)    |
| 691.3(a',339.4)   | 658.5(a <sub>1</sub> ,49.4)    | 663.7(a,60.6)    | 711.9(a',217.4)   | 683.9(a',20.7)    |
| 1339.1(a",330.9)  | 1367.9(b <sub>1</sub> ,649.2)  | 1323.0(a,294.1)  | 1224.0(a',237.7)  | 1360.5(a',271.3)  |
| 1364.6(a',383.1)  | 1369.0(a <sub>1</sub> ,196.2)  | 1461.8(a,744.3)  | 1483.1(a',583.3)  | 1445.2(a',820.9)  |
| 1828.4(a',464.9)  | 1973.4(a <sub>2</sub> ,0.0)    | 1889.3(a,393.4)  | 1814.3(a',331.4)  | 1939.5(a",368.4)  |
| 1976.0(a",485.4)  | 1974.3(b <sub>2</sub> ,126.4)  | 1967.6(a,416.9)  | 1960.6(a",665.2)  | 1953.5(a',32.4)   |
| 1991.6(a',681.2)  | 1976.6(b <sub>1</sub> ,1225.6) | 1975.6(a,529.6)  | 1983.1(a",1245.8) | 1972.8(a',526.0)  |
| 1993.1(a",1054.9) | 1991.3(a <sub>1</sub> ,1334.4) | 1984.0(a,1176.9) | 1988.2(a',656.4)  | 1982.8(a',1686.6) |
| 2005.0(a',1741.2) | 2009.0(b <sub>2</sub> ,2027.7) | 2003.0(a,1661.2) | 1999.9(a',1371.5) | 1986.4(a",1273.5) |
| 2052.2(a',273.1)  | 2050.1(a <sub>1</sub> ,126.6)  | 2046.1(a,374.6)  | 2046.9(a',388.7)  | 2046.6(a',462.7)  |

**Table S4.** Theoretical harmonic vibrational frequencies (in  $\text{cm}^{-1}$ ) for optimized structures of  $\text{Mn}_2(\text{BF})_2(\text{CO})_6$  using the BP86/TZP method (infrared intensities in parentheses are in  $\text{km/mol}$ ).

| <b>6-1T(<math>C_s</math>)</b> | <b>6-2T(<math>C_s</math>)</b> | <b>6-3T(<math>C_s</math>)</b> |
|-------------------------------|-------------------------------|-------------------------------|
| 17.3(a",0.0)                  | -12.2(a",0.0)                 | 24.9(a",0.0)                  |
| 26.5(a',1.0)                  | 39.1(a",0.0)                  | 40.9(a',0.3)                  |
| 38.5(a",0.1)                  | 47.9(a',0.3)                  | 46.2(a",0.0)                  |
| 60.4(a",0.7)                  | 68.4(a",0.3)                  | 54.1(a",0.0)                  |
| 68.3(a',1.2)                  | 71.2(a',0.2)                  | 64.8(a',2.6)                  |
| 72.8(a",0.0)                  | 81.3(a",1.6)                  | 75.8(a',0.1)                  |
| 78.2(a',0.1)                  | 84.8(a',1.0)                  | 84.4(a",0.3)                  |
| 81.7(a",1.6)                  | 86.1(a",0.0)                  | 88.2(a",0.9)                  |
| 83.4(a',0.1)                  | 88.5(a',0.2)                  | 88.5(a',0.1)                  |
| 85.9(a',0.1)                  | 92.6(a',0.2)                  | 96.1(a',0.0)                  |
| 98.0(a',0.7)                  | 113.5(a',0.4)                 | 111.9(a',0.1)                 |
| 105.5(a",0.0)                 | 121.3(a',0.6)                 | 117.5(a",0.4)                 |
| 111.0(a',0.1)                 | 128.4(a",0.0)                 | 152.5(a',0.1)                 |
| 191.5(a',0.0)                 | 213.1(a',0.0)                 | 221.4(a",0.0)                 |
| 236.2(a',0.3)                 | 227.7(a',0.0)                 | 223.8(a',0.4)                 |
| 240.7(a",0.0)                 | 248.9(a",0.2)                 | 235.2(a',0.5)                 |
| 327.3(a",1.0)                 | 339.4(a",1.1)                 | 328.2(a',1.8)                 |
| 369.7(a",0.1)                 | 375.3(a',0.2)                 | 346.3(a",0.7)                 |
| 372.4(a',2.9)                 | 382.4(a",0.3)                 | 360.7(a",0.0)                 |
| 390.4(a',2.0)                 | 389.1(a',1.4)                 | 380.4(a",0.5)                 |
| 398.4(a",1.0)                 | 396.5(a",0.0)                 | 405.9(a",0.1)                 |
| 410.6(a',1.3)                 | 405.7(a",1.4)                 | 406.1(a',1.9)                 |
| 410.8(a",0.0)                 | 414.6(a",0.4)                 | 412.1(a',8.8)                 |
| 420.4(a",0.5)                 | 421.2(a',1.4)                 | 426.3(a",0.0)                 |
| 432.4(a',3.5)                 | 429.4(a",0.7)                 | 439.2(a",0.0)                 |
| 434.5(a",1.1)                 | 442.3(a',3.1)                 | 440.0(a',3.1)                 |
| 443.0(a",0.3)                 | 448.1(a',13.6)                | 442.4(a",0.3)                 |
| 456.2(a',24.7)                | 455.2(a",0.2)                 | 461.2(a',1.4)                 |
| 476.3(a',26.4)                | 464.9(a',3.9)                 | 466.2(a',3.5)                 |
| 486.5(a",1.3)                 | 483.5(a",0.2)                 | 484.9(a",4.7)                 |
| 491.9(a',11.6)                | 496.2(a',1.1)                 | 486.5(a',1.4)                 |
| 503.3(a",9.2)                 | 528.3(a',8.1)                 | 505.3(a',2.1)                 |
| 534.3(a',2.4)                 | 529.1(a",0.4)                 | 522.7(a',21.9)                |
| 547.3(a',3.3)                 | 554.1(a',4.3)                 | 540.3(a",0.3)                 |
| 588.3(a',63.5)                | 588.2(a",19.1)                | 540.4(a',26.3)                |
| 589.6(a",24.0)                | 589.9(a',35.4)                | 562.3(a",7.5)                 |
| 613.0(a',5.3)                 | 599.2(a',133.0)               | 598.0(a',108.7)               |
| 617.7(a',146.8)               | 610.6(a",46.8)                | 641.8(a',103.8)               |
| 618.4(a",37.3)                | 630.2(a',69.4)                | 647.2(a",71.8)                |
| 653.9(a',65.3)                | 654.9(a',79.2)                | 664.8(a',329.5)               |
| 1351.4(a",740.8)              | 1330.3(a",625.8)              | 1331.3(a",489.4)              |
| 1361.2(a',107.7)              | 1334.7(a',123.7)              | 1342.8(a',196.2)              |
| 1960.6(a',232.4)              | 1961.1(a',1.1)                | 1901.9(a',686.8)              |
| 1971.9(a",495.0)              | 1967.9(a",460.3)              | 1950.3(a",670.8)              |
| 1975.0(a',1192.4)             | 1980.3(a",992.9)              | 1975.7(a',1889.9)             |
| 1982.3(a",966.5)              | 1980.4(a',1312.3)             | 1998.3(a",859.4)              |
| 1988.8(a',2700.2)             | 1996.2(a',2292.6)             | 1999.9(a',573.4)              |
| 2040.5(a',59.3)               | 2039.8(a',90.9)               | 2051.7(a',422.0)              |

Table S5. Theoretical Cartesian coordinates (in Å) for the structures at M06-L/TZP level.

| Structures                  | Atomic Number | Coordinates (Angstroms) |              |              |
|-----------------------------|---------------|-------------------------|--------------|--------------|
|                             |               | X                       | Y            | Z            |
| <b>8-1S(D<sub>2h</sub>)</b> | 25            | -1.363099000            | 0.000000000  | 0.000000000  |
|                             | 25            | 1.363099000             | 0.000000000  | 0.000000000  |
|                             | 6             | -1.436924000            | 0.000000000  | 1.838654000  |
|                             | 6             | -2.493478000            | 1.417274000  | 0.000000000  |
|                             | 6             | -1.436924000            | 0.000000000  | -1.838654000 |
|                             | 6             | 1.436924000             | 0.000000000  | 1.838654000  |
|                             | 6             | 2.493478000             | -1.417274000 | 0.000000000  |
|                             | 5             | 0.000000000             | 1.524072000  | 0.000000000  |
|                             | 6             | 1.436924000             | 0.000000000  | -1.838654000 |
|                             | 6             | 2.493478000             | 1.417274000  | 0.000000000  |
|                             | 8             | 1.548301000             | 0.000000000  | 2.976410000  |
|                             | 8             | 3.192711000             | -2.325748000 | 0.000000000  |
|                             | 8             | -1.548301000            | 0.000000000  | 2.976410000  |
|                             | 8             | -1.548301000            | 0.000000000  | -2.976410000 |
|                             | 8             | -3.192711000            | 2.325748000  | 0.000000000  |
|                             | 8             | 1.548301000             | 0.000000000  | -2.976410000 |
|                             | 9             | 0.000000000             | 2.819944000  | 0.000000000  |
|                             | 8             | 3.192711000             | 2.325748000  | 0.000000000  |
|                             | 6             | -2.493478000            | -1.417274000 | 0.000000000  |
|                             | 8             | -3.192711000            | -2.325748000 | 0.000000000  |
| 5                           | 0.000000000   | -1.524072000            | 0.000000000  |              |
| 9                           | 0.000000000   | -2.819944000            | 0.000000000  |              |
| <b>8-2S(C<sub>s</sub>)</b>  | 25            | 0.412458000             | 1.265414000  | 0.000000000  |
|                             | 25            | -0.251144000            | -1.366687000 | 0.000000000  |
|                             | 6             | 0.419130000             | 1.460963000  | 1.826803000  |
|                             | 6             | 1.918828000             | 2.292116000  | 0.000000000  |
|                             | 6             | 0.419130000             | 1.460963000  | -1.826803000 |
|                             | 6             | -0.281373000            | -1.384395000 | 1.843397000  |
|                             | 6             | -1.899465000            | -2.087239000 | 0.000000000  |
|                             | 6             | 1.599623000             | -0.428856000 | 0.000000000  |
|                             | 6             | -0.281373000            | -1.384395000 | -1.843397000 |
|                             | 6             | 0.699244000             | -2.928012000 | 0.000000000  |
|                             | 8             | -0.328852000            | -1.430259000 | 2.984726000  |
|                             | 8             | -2.958016000            | -2.529913000 | 0.000000000  |
|                             | 8             | 0.419130000             | 1.690247000  | 2.949123000  |
|                             | 8             | 0.419130000             | 1.690247000  | -2.949123000 |
|                             | 8             | 2.833265000             | 2.980256000  | 0.000000000  |
|                             | 8             | -0.328852000            | -1.430259000 | -2.984726000 |
|                             | 8             | 2.730021000             | -0.701935000 | 0.000000000  |
|                             | 8             | 1.283154000             | -3.911301000 | 0.000000000  |
|                             | 5             | -0.896567000            | 2.499842000  | 0.000000000  |
|                             | 9             | -1.827729000            | 3.367037000  | 0.000000000  |
| 5                           | -1.398804000  | 0.350730000             | 0.000000000  |              |
| 9                           | -2.691193000  | 0.568013000             | 0.000000000  |              |

|                            |                            |              |              |              |              |
|----------------------------|----------------------------|--------------|--------------|--------------|--------------|
| <b>7-1S(C<sub>s</sub>)</b> | 25                         | 0.124289000  | -1.246695000 | 0.000000000  |              |
|                            | 25                         | 0.202242000  | 1.281008000  | 0.000000000  |              |
|                            | 5                          | -0.182719000 | 0.056980000  | 1.533129000  |              |
|                            | 6                          | 1.877695000  | -0.723921000 | 0.000000000  |              |
|                            | 5                          | -0.182719000 | 0.056980000  | -1.533129000 |              |
|                            | 6                          | 0.578774000  | 2.353502000  | 1.415541000  |              |
|                            | 6                          | 0.578774000  | 2.353502000  | -1.415541000 |              |
|                            | 6                          | -1.481841000 | 1.780677000  | 0.000000000  |              |
|                            | 6                          | 0.348578000  | -2.357745000 | 1.427882000  |              |
|                            | 6                          | -1.700876000 | -1.509894000 | 0.000000000  |              |
|                            | 6                          | 0.348578000  | -2.357745000 | -1.427882000 |              |
|                            | 8                          | 2.955402000  | -0.326890000 | 0.000000000  |              |
|                            | 9                          | -0.524007000 | 0.036186000  | -2.782364000 |              |
|                            | 9                          | -0.524007000 | 0.036186000  | 2.782364000  |              |
|                            | 8                          | -2.599512000 | 2.055945000  | 0.000000000  |              |
|                            | 8                          | 0.753646000  | 3.035227000  | -2.323658000 |              |
|                            | <b>7-2S(C<sub>s</sub>)</b> | 8            | 0.474346000  | -3.043271000 | -2.337365000 |
|                            |                            | 8            | -2.837133000 | -1.626618000 | 0.000000000  |
| 8                          |                            | 0.753646000  | 3.035227000  | 2.323658000  |              |
| 8                          |                            | 0.474346000  | -3.043271000 | 2.337365000  |              |
| 25                         |                            | 0.129129000  | 1.259184000  | 0.000000000  |              |
| 25                         |                            | 0.172838000  | -1.236871000 | 0.000000000  |              |
| 6                          |                            | 1.836348000  | -0.368075000 | 0.000000000  |              |
| 5                          |                            | -1.097894000 | 0.085117000  | 0.953897000  |              |
| 5                          |                            | -1.097894000 | 0.085117000  | -0.953897000 |              |
| 6                          |                            | 0.757971000  | -2.276182000 | 1.383336000  |              |
| 6                          |                            | -1.407391000 | -2.131266000 | 0.000000000  |              |
| 6                          |                            | 0.757971000  | -2.276182000 | -1.383336000 |              |
| 6                          |                            | 1.755272000  | 2.167496000  | 0.000000000  |              |
| 6                          |                            | -0.586420000 | 2.317138000  | -1.255927000 |              |
| 6                          |                            | -0.586420000 | 2.317138000  | 1.255927000  |              |
| 9                          |                            | -2.142227000 | 0.032616000  | 1.727223000  |              |
| 9                          |                            | -2.142227000 | 0.032616000  | -1.727223000 |              |
| 8                          |                            | 2.991623000  | -0.288689000 | 0.000000000  |              |
| 8                          | 1.105654000                | -2.905044000 | -2.272830000 |              |              |
| 8                          | -2.393118000               | -2.718249000 | 0.000000000  |              |              |
| 8                          | -1.071962000               | 2.963461000  | 2.070483000  |              |              |
| 8                          | -1.071962000               | 2.963461000  | -2.070483000 |              |              |
| 8                          | 1.105654000                | -2.905044000 | 2.272830000  |              |              |
| 8                          | 2.687346000                | 2.828043000  | 0.000000000  |              |              |



|                            |              |              |              |              |
|----------------------------|--------------|--------------|--------------|--------------|
| <b>7-3S(C<sub>s</sub>)</b> | 25           | 0.134082000  | -0.083528000 | 1.240525000  |
|                            | 25           | 0.134082000  | -0.083528000 | -1.240525000 |
|                            | 6            | 1.728269000  | -0.072481000 | 0.000000000  |
|                            | 5            | -1.222873000 | -0.864781000 | 0.000000000  |
|                            | 5            | -1.034921000 | 0.973484000  | 0.000000000  |
|                            | 6            | 1.520700000  | -0.549259000 | -2.364517000 |
|                            | 6            | -1.036022000 | -0.988391000 | -2.265833000 |
|                            | 6            | -0.100459000 | 1.468733000  | -2.119276000 |
|                            | 6            | 1.520700000  | -0.549259000 | 2.364517000  |
|                            | 6            | -0.100459000 | 1.468733000  | 2.119276000  |
|                            | 6            | -1.036022000 | -0.988391000 | 2.265833000  |
|                            | 9            | -2.372866000 | -1.494753000 | 0.000000000  |
|                            | 9            | -1.890834000 | 1.950453000  | 0.000000000  |
|                            | 8            | 2.897523000  | -0.052502000 | 0.000000000  |
|                            | 8            | -0.283254000 | 2.473695000  | -2.641645000 |
|                            | 8            | -1.766865000 | -1.585311000 | -2.917573000 |
|                            | 8            | -1.766865000 | -1.585311000 | 2.917573000  |
| 8                          | -0.283254000 | 2.473695000  | 2.641645000  |              |
| 8                          | 2.349977000  | -0.812540000 | -3.103122000 |              |
| 8                          | 2.349977000  | -0.812540000 | 3.103122000  |              |
| <b>7-4S(C<sub>1</sub>)</b> | 25           | -1.256577000 | -0.051855000 | -0.075803000 |
|                            | 25           | 1.208787000  | -0.163354000 | 0.007207000  |
|                            | 6            | 0.623048000  | -0.163619000 | 1.737097000  |
|                            | 6            | 1.892295000  | -1.860380000 | 0.296712000  |
|                            | 6            | 2.569864000  | 0.045886000  | -1.169790000 |
|                            | 6            | -0.522435000 | -1.635445000 | -0.764084000 |
|                            | 6            | -2.351135000 | 0.018664000  | -1.482748000 |
|                            | 6            | -1.915220000 | 1.551437000  | 0.441133000  |
|                            | 8            | 2.400568000  | -2.864370000 | 0.505012000  |
|                            | 8            | 3.480974000  | 0.203715000  | -1.853233000 |
|                            | 8            | 0.423047000  | -0.141441000 | 2.871786000  |
|                            | 8            | -2.385608000 | 2.560948000  | 0.727642000  |
|                            | 8            | -0.440116000 | -2.660781000 | -1.287282000 |
|                            | 8            | -3.022043000 | 0.078215000  | -2.411237000 |
|                            | 6            | -2.408478000 | -1.017616000 | 0.965410000  |
|                            | 8            | -3.130634000 | -1.599098000 | 1.636305000  |
|                            | 5            | 0.124620000  | 1.406083000  | -0.499955000 |
| 5                          | 2.005510000  | 1.337401000  | 0.554158000  |              |
| 9                          | 0.133038000  | 2.640413000  | -0.937209000 |              |
| 9                          | 2.601068000  | 2.405333000  | 0.913828000  |              |

|                             |                            |              |              |              |              |
|-----------------------------|----------------------------|--------------|--------------|--------------|--------------|
| <b>7-1T(C<sub>s</sub>)</b>  | 25                         | 0.198315000  | -1.204247000 | 0.000000000  |              |
|                             | 25                         | 0.144835000  | 1.231189000  | 0.000000000  |              |
|                             | 5                          | -0.887355000 | 0.064901000  | 1.210107000  |              |
|                             | 6                          | 1.849746000  | -0.265448000 | 0.000000000  |              |
|                             | 5                          | -0.887355000 | 0.064901000  | -1.210107000 |              |
|                             | 6                          | 0.831940000  | 2.253454000  | 1.406477000  |              |
|                             | 6                          | 0.831940000  | 2.253454000  | -1.406477000 |              |
|                             | 6                          | -1.454173000 | 2.046707000  | 0.000000000  |              |
|                             | 6                          | 0.761856000  | -2.237116000 | 1.412113000  |              |
|                             | 6                          | -1.419243000 | -2.031861000 | 0.000000000  |              |
|                             | 6                          | 0.761856000  | -2.237116000 | -1.412113000 |              |
|                             | 8                          | 2.977237000  | -0.022183000 | 0.000000000  |              |
|                             | 9                          | -1.845325000 | -0.000758000 | -2.070291000 |              |
|                             | 9                          | -1.845325000 | -0.000758000 | 2.070291000  |              |
|                             | 8                          | -2.494147000 | 2.542422000  | 0.000000000  |              |
|                             | 8                          | 1.181301000  | 2.894325000  | -2.286310000 |              |
|                             | 8                          | 1.081169000  | -2.878372000 | -2.304580000 |              |
|                             | 8                          | -2.442143000 | -2.552314000 | 0.000000000  |              |
|                             | 8                          | 1.181301000  | 2.894325000  | 2.286310000  |              |
|                             | 8                          | 1.081169000  | -2.878372000 | 2.304580000  |              |
|                             | <b>6-1S(C<sub>s</sub>)</b> | 25           | -0.230131000 | -1.136836000 | 0.000000000  |
|                             |                            | 25           | -0.435456000 | 1.263939000  | 0.000000000  |
|                             |                            | 5            | 0.909530000  | 0.415542000  | 0.972858000  |
|                             |                            | 5            | 0.909530000  | 0.415542000  | -0.972858000 |
|                             |                            | 9            | 1.950624000  | 0.439255000  | 1.745152000  |
| 9                           |                            | 1.950624000  | 0.439255000  | -1.745152000 |              |
| 6                           |                            | 1.462737000  | -1.801493000 | 0.000000000  |              |
| 6                           |                            | -0.667312000 | -2.249325000 | 1.372232000  |              |
| 6                           |                            | -1.802587000 | -0.173499000 | 0.000000000  |              |
| 6                           |                            | -0.667312000 | -2.249325000 | -1.372232000 |              |
| 6                           |                            | -0.177820000 | 2.545299000  | -1.250241000 |              |
| 6                           |                            | -0.177820000 | 2.545299000  | 1.250241000  |              |
| 8                           |                            | 0.064533000  | 3.316750000  | 2.065107000  |              |
| 8                           |                            | 0.064533000  | 3.316750000  | -2.065107000 |              |
| 8                           |                            | -0.935217000 | -2.922092000 | 2.258264000  |              |
| 8                           |                            | -0.935217000 | -2.922092000 | -2.258264000 |              |
| 8                           |                            | 2.523915000  | -2.238329000 | 0.000000000  |              |
| 8                           |                            | -2.705817000 | 0.581346000  | 0.000000000  |              |
| <b>6-2S(C<sub>2v</sub>)</b> |                            | 25           | 0.000000000  | 1.136984000  | 0.050072000  |
|                             |                            | 25           | 0.000000000  | -1.136984000 | 0.050072000  |
|                             |                            | 6            | 1.231092000  | -2.339836000 | -0.510742000 |
|                             |                            | 6            | -1.231092000 | -2.339836000 | -0.510742000 |
|                             |                            | 6            | -1.231092000 | 2.339836000  | -0.510742000 |
|                             |                            | 6            | 1.231092000  | 2.339836000  | -0.510742000 |
|                             |                            | 5            | 1.455449000  | 0.000000000  | -0.690069000 |
|                             | 6                          | 0.000000000  | -1.604859000 | 1.815401000  |              |
|                             | 5                          | -1.455449000 | 0.000000000  | -0.690069000 |              |
|                             | 6                          | 0.000000000  | 1.604859000  | 1.815401000  |              |
|                             | 9                          | -2.583702000 | 0.000000000  | -1.309784000 |              |
|                             | 8                          | 2.008552000  | 3.094587000  | -0.890336000 |              |
|                             | 8                          | -2.008552000 | 3.094587000  | -0.890336000 |              |
|                             | 8                          | 0.000000000  | 1.848667000  | 2.933558000  |              |
|                             | 8                          | 0.000000000  | -1.848667000 | 2.933558000  |              |
|                             | 8                          | 2.008552000  | -3.094587000 | -0.890336000 |              |
|                             | 9                          | 2.583702000  | 0.000000000  | -1.309784000 |              |
|                             | 8                          | -2.008552000 | -3.094587000 | -0.890336000 |              |

|                            |                            |              |              |              |              |
|----------------------------|----------------------------|--------------|--------------|--------------|--------------|
| <b>6-3S(C<sub>1</sub>)</b> | 25                         | -1.110659000 | -0.193727000 | 0.082532000  |              |
|                            | 25                         | 1.161790000  | -0.062966000 | -0.043320000 |              |
|                            | 5                          | -0.296156000 | 1.425861000  | -0.457993000 |              |
|                            | 6                          | 2.129994000  | 1.372323000  | -0.486653000 |              |
|                            | 6                          | -1.156615000 | -0.236674000 | 1.903654000  |              |
|                            | 6                          | -2.649376000 | -1.055020000 | -0.294020000 |              |
|                            | 6                          | -0.150819000 | -1.522154000 | -0.880294000 |              |
|                            | 6                          | 1.916652000  | -0.198086000 | 1.586316000  |              |
|                            | 6                          | 2.465260000  | -1.030264000 | -0.854631000 |              |
|                            | 5                          | -2.338842000 | 1.038851000  | -0.369598000 |              |
|                            | 8                          | 3.277411000  | -1.627905000 | -1.397361000 |              |
|                            | 8                          | -3.643934000 | -1.577447000 | -0.554341000 |              |
|                            | 8                          | -1.188895000 | -0.208410000 | 3.048782000  |              |
|                            | 9                          | -3.251276000 | 1.857771000  | -0.718725000 |              |
|                            | 8                          | 2.358585000  | -0.258881000 | 2.642369000  |              |
|                            | 9                          | -0.262358000 | 2.668337000  | -0.839211000 |              |
|                            | 8                          | -0.030056000 | -2.453315000 | -1.556556000 |              |
|                            | 8                          | 2.750494000  | 2.298215000  | -0.766287000 |              |
|                            | <b>6-4S(C<sub>s</sub>)</b> | 25           | 0.111587000  | -1.317880000 | 0.000000000  |
|                            |                            | 25           | 0.384155000  | 1.161918000  | 0.000000000  |
| 6                          |                            | 0.682068000  | 2.237478000  | 1.408078000  |              |
| 5                          |                            | -1.099698000 | 2.136750000  | 0.000000000  |              |
| 6                          |                            | 0.682068000  | 2.237478000  | -1.408078000 |              |
| 6                          |                            | 0.546856000  | -2.384060000 | -1.393850000 |              |
| 6                          |                            | 0.546856000  | -2.384060000 | 1.393850000  |              |
| 6                          |                            | -1.533277000 | -2.070895000 | 0.000000000  |              |
| 5                          |                            | -1.293116000 | 0.121425000  | 0.000000000  |              |
| 6                          |                            | 1.668529000  | -0.418080000 | 0.000000000  |              |
| 8                          |                            | -2.555005000 | -2.595214000 | 0.000000000  |              |
| 9                          |                            | -2.063089000 | 2.965066000  | 0.000000000  |              |
| 8                          |                            | 0.815707000  | 2.921421000  | 2.322459000  |              |
| 8                          |                            | 0.815707000  | 2.921421000  | -2.322459000 |              |
| 8                          |                            | 0.815707000  | -3.025351000 | 2.304882000  |              |
| 8                          |                            | 0.815707000  | -3.025351000 | -2.304882000 |              |
| 9                          |                            | -2.616243000 | 0.246221000  | 0.000000000  |              |
| 8                          |                            | 2.557917000  | 0.353001000  | 0.000000000  |              |
| <b>6-5S(C<sub>s</sub>)</b> |                            | 25           | -1.133432000 | -0.223068000 | 0.000038000  |
|                            |                            | 25           | 1.140288000  | -0.042110000 | -0.000023000 |
|                            | 5                          | -0.463936000 | 1.512617000  | -0.000187000 |              |
|                            | 6                          | 2.048972000  | 1.488117000  | -0.000116000 |              |
|                            | 6                          | -0.513809000 | -0.945606000 | 1.566516000  |              |
|                            | 6                          | -2.758338000 | -1.008556000 | -0.000022000 |              |
|                            | 6                          | -0.513592000 | -0.946136000 | -1.566133000 |              |
|                            | 6                          | 2.246570000  | -0.671602000 | 1.266394000  |              |
|                            | 6                          | 2.246684000  | -0.671740000 | -1.266273000 |              |
|                            | 5                          | -2.442347000 | 1.010969000  | -0.000126000 |              |
|                            | 8                          | 2.923593000  | -1.063299000 | -2.103556000 |              |
|                            | 8                          | -3.811506000 | -1.482436000 | -0.000066000 |              |
|                            | 8                          | -0.321521000 | -1.389595000 | 2.612928000  |              |
|                            | 9                          | -3.414908000 | 1.840906000  | -0.000249000 |              |
|                            | 8                          | 2.923400000  | -1.063071000 | 2.103784000  |              |
|                            | 9                          | -0.403228000 | 2.806108000  | -0.000337000 |              |
|                            | 8                          | -0.321298000 | -1.390512000 | -2.612383000 |              |
|                            | 8                          | 2.630373000  | 2.479106000  | -0.000172000 |              |

|                            |                            |              |              |              |             |
|----------------------------|----------------------------|--------------|--------------|--------------|-------------|
| <b>6-1T(C<sub>s</sub>)</b> | 25                         | 0.116376000  | 1.260807000  | 0.000000000  |             |
|                            | 25                         | -0.021412000 | -1.050411000 | 0.000000000  |             |
|                            | 5                          | 0.610554000  | 0.053075000  | 1.547435000  |             |
|                            | 5                          | 0.610554000  | 0.053075000  | -1.547435000 |             |
|                            | 6                          | -0.793374000 | -2.021618000 | -1.342956000 |             |
|                            | 6                          | 1.475017000  | -2.016080000 | 0.000000000  |             |
|                            | 6                          | -0.793374000 | -2.021618000 | 1.342956000  |             |
|                            | 6                          | 0.206519000  | 2.461544000  | -1.393417000 |             |
|                            | 6                          | -1.663877000 | 0.924379000  | 0.000000000  |             |
|                            | 6                          | 0.206519000  | 2.461544000  | 1.393417000  |             |
|                            | 9                          | 1.018884000  | 0.027391000  | 2.767283000  |             |
|                            | 9                          | 1.018884000  | 0.027391000  | -2.767283000 |             |
|                            | 8                          | -1.262505000 | -2.630450000 | -2.193467000 |             |
|                            | 8                          | 0.267071000  | 3.188413000  | -2.278369000 |             |
|                            | 8                          | -1.262505000 | -2.630450000 | 2.193467000  |             |
|                            | 8                          | 2.473867000  | -2.584297000 | 0.000000000  |             |
|                            | 8                          | -2.813517000 | 0.841795000  | 0.000000000  |             |
|                            | 8                          | 0.267071000  | 3.188413000  | 2.278369000  |             |
|                            | <b>6-2T(C<sub>s</sub>)</b> | 25           | 0.096030000  | -1.298999000 | 0.000000000 |
|                            |                            | 25           | -0.001736000 | 1.058168000  | 0.000000000 |
| 5                          |                            | 0.639419000  | -0.129170000 | -1.509399000 |             |
| 5                          |                            | 0.639419000  | -0.129170000 | 1.509399000  |             |
| 6                          |                            | -1.566604000 | 1.988479000  | 0.000000000  |             |
| 6                          |                            | 0.688109000  | 2.108324000  | 1.282379000  |             |
| 6                          |                            | 0.688109000  | 2.108324000  | -1.282379000 |             |
| 6                          |                            | 0.202630000  | -2.472754000 | 1.421957000  |             |
| 6                          |                            | -1.682566000 | -0.941652000 | 0.000000000  |             |
| 6                          |                            | 0.202630000  | -2.472754000 | -1.421957000 |             |
| 9                          |                            | 1.124784000  | -0.125925000 | -2.709884000 |             |
| 9                          |                            | 1.124784000  | -0.125925000 | 2.709884000  |             |
| 8                          |                            | -2.567901000 | 2.543153000  | 0.000000000  |             |
| 8                          |                            | 0.283994000  | -3.175526000 | 2.323001000  |             |
| 8                          |                            | 1.152723000  | 2.807850000  | -2.068701000 |             |
| 8                          |                            | 1.152723000  | 2.807850000  | 2.068701000  |             |
| 8                          |                            | -2.829470000 | -0.848884000 | 0.000000000  |             |
| 8                          |                            | 0.283994000  | -3.175526000 | -2.323001000 |             |
| <b>6-3T(C<sub>s</sub>)</b> |                            | 25           | -0.214055000 | -1.121693000 | 0.000000000 |
|                            |                            | 25           | -0.611211000 | 1.352516000  | 0.000000000 |
|                            | 5                          | 0.700494000  | 0.373637000  | 1.062059000  |             |
|                            | 5                          | 0.700494000  | 0.373637000  | -1.062059000 |             |
|                            | 9                          | 1.721804000  | 0.447670000  | 1.865902000  |             |
|                            | 9                          | 1.721804000  | 0.447670000  | -1.865902000 |             |
|                            | 6                          | 1.504972000  | -1.744341000 | 0.000000000  |             |
|                            | 6                          | -0.550931000 | -2.125695000 | 1.498294000  |             |
|                            | 6                          | -1.859339000 | -0.343260000 | 0.000000000  |             |
|                            | 6                          | -0.550931000 | -2.125695000 | -1.498294000 |             |
|                            | 6                          | -0.060146000 | 2.414263000  | -1.385436000 |             |
|                            | 6                          | -0.060146000 | 2.414263000  | 1.385436000  |             |
|                            | 8                          | 0.349583000  | 3.094922000  | 2.217950000  |             |
|                            | 8                          | 0.349583000  | 3.094922000  | -2.217950000 |             |
|                            | 8                          | -0.728744000 | -2.732539000 | 2.453126000  |             |
|                            | 8                          | -0.728744000 | -2.732539000 | -2.453126000 |             |
|                            | 8                          | 2.585914000  | -2.120978000 | 0.000000000  |             |
|                            | 8                          | -2.815917000 | 0.333434000  | 0.000000000  |             |

## Complete Gaussian 09 reference (Reference 45)

Gaussian 09, Revision B.01,

M. J. Frisch, G. W. Trucks, H. B. Schlegel, G. E. Scuseria, M. A. Robb, J. R. Cheeseman, G. Scalmani, V. Barone, B. Mennucci, G. A. Petersson, H. Nakatsuji, M. Caricato, X. Li, H. P. Hratchian, A. F. Izmaylov, J. Bloino, G. Zheng, J. L. Sonnenberg, M. Hada, M. Ehara, K. Toyota, R. Fukuda, J. Hasegawa, M. Ishida, T. Nakajima, Y. Honda, O. Kitao, H. Nakai, T. Vreven, J. A. Montgomery, Jr., J. E. Peralta, F. Ogliaro, M. Bearpark, J. J. Heyd, E. Brothers, K. N. Kudin, V. N. Staroverov, T. Keith, R. Kobayashi, J. Normand, K. Raghavachari, A. Rendell, J. C. Burant, S. S. Iyengar, J. Tomasi, M. Cossi, N. Rega, J. M. Millam, M. Klene, J. E. Knox, J. B. Cross, V. Bakken, C. Adamo, J. Jaramillo, R. Gomperts, R. E. Stratmann, O. Yazyev, A. J. Austin, R. Cammi, C. Pomelli, J. W. Ochterski, R. L. Martin, K. Morokuma, V. G. Zakrzewski, G. A. Voth, P. Salvador, J. J. Dannenberg, S. Dapprich, A. D. Daniels, O. Farkas, J. B. Foresman, J. V. Ortiz, J. Cioslowski, and D. J. Fox, Gaussian, Inc., Wallingford CT, 2010.

$\pi$
